# Supplementary material
Source: publisher site journal article supplement (https://www.dovepress.com/article/244315)
Supplement: Supplementary file 1 [file get_supplementary_file.php]

**Supplementary information**


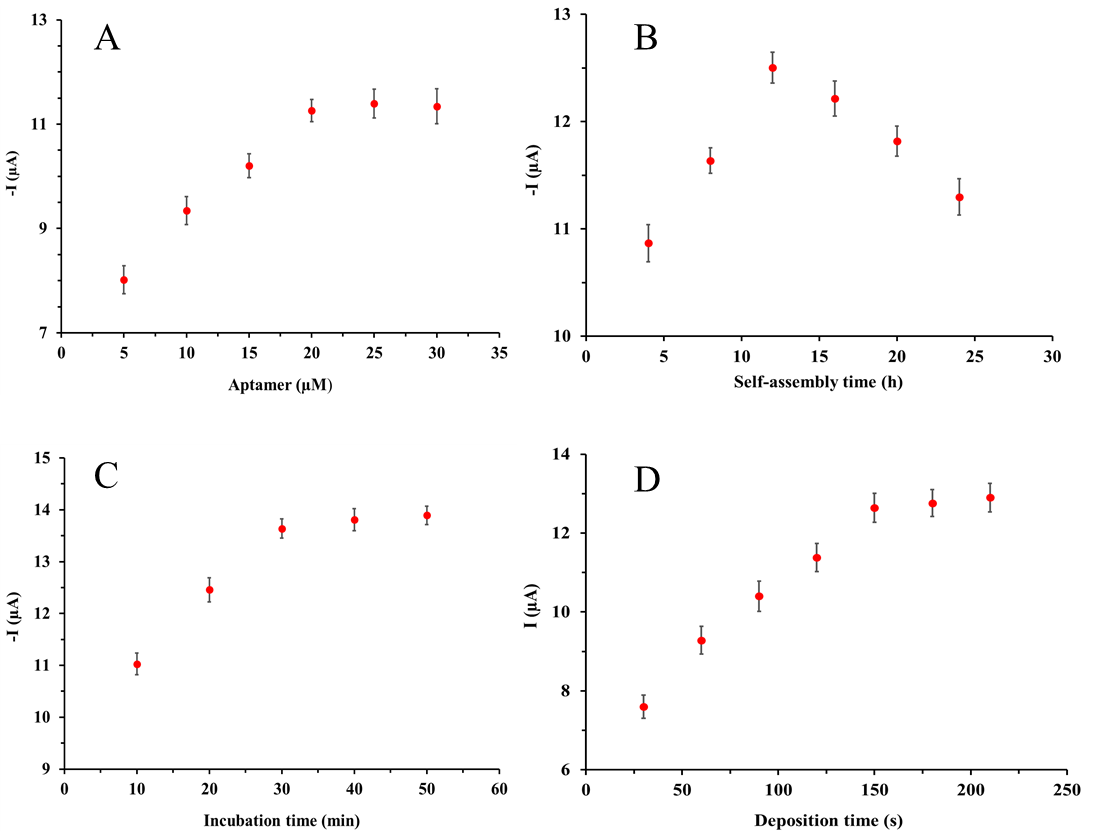


**Figure S1** Optimization of the experimental conditions in terms of (A) aptamer concentration, (B) self-assembly time, (C) incubation time, and (D) electrodeposition time.


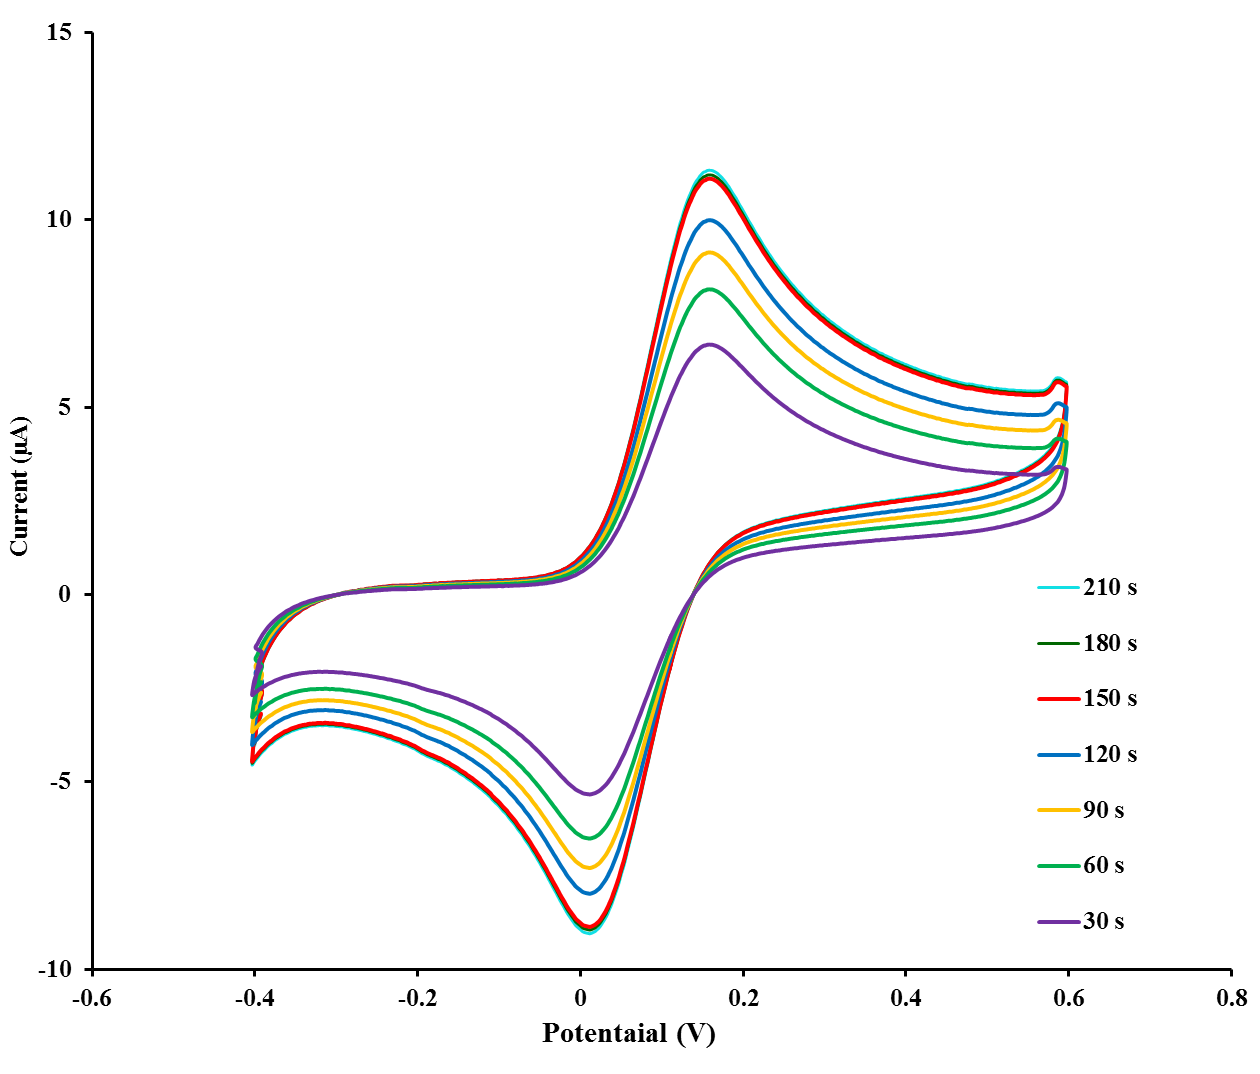
**Figure S2** The cyclic voltammograms of the fabricated aptasensor in various electrodeposition time of flower-like gold microstructures on electrode surface.


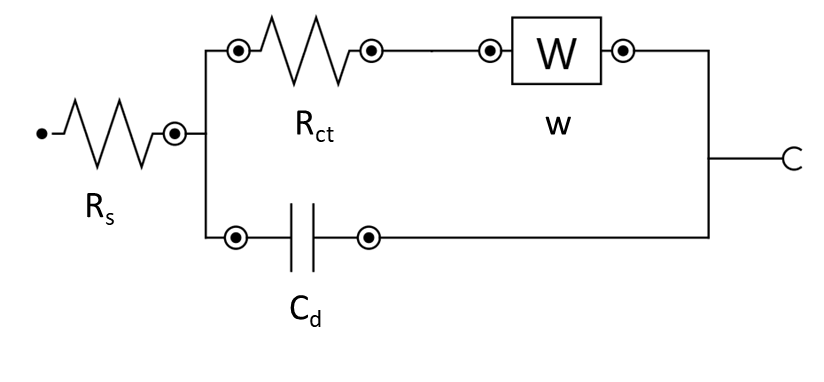


**Figure S3** Randles equivalent circuit used for fitting the electrochemical impedance data (Rs: solution resistance, Cd: double layer capacitance, Rct: charge transfer resistance, W: Warburg impedance).


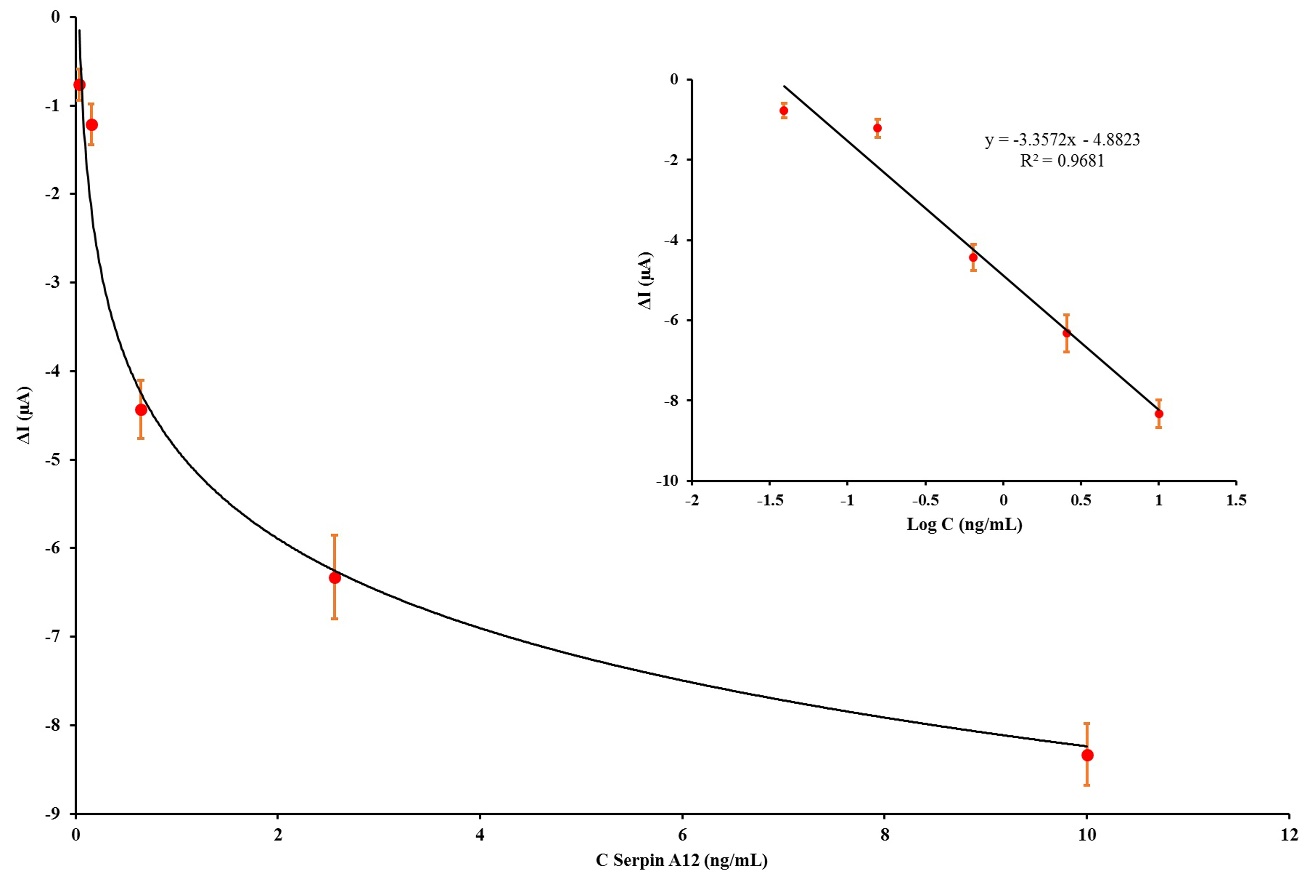


**Figure S4** The calibration curve of the fabricated aptasensor after incubation with various concentration of serpin A12 in plasma samples: 0 ng/mL, 0.039 ng/mL, 0.156 ng/mL, 0.625 ng/mL, 2.56 ng/mL, and 10 ng/mL. The inset is the linear relationship between differential pulse voltammetry peak current response and serpin A12 concentration. The standard deviations of three duplicate measurements indicated by error bars.
